# Supplementary material for: Enhancement of Tainan 9 Peanut Seed Storability and Germination under Low Temperature
Source: Hindawi journal article supplement (doi:10.1155/2020/8813285), 2020-10-28
Supplement: f1 [file 8813285.f1.doc]

**Supplementary Data**

TABLE S1:Effects of seed priming with salicylic acid (SA) on germination percentage and mean germination time of Tainan 9 peanut seeds at 25°C and 15°C.

| Treatments | Germination (%) | |  | Mean germination time (days) | |
| --- | --- | --- | --- | --- | --- |
| 25 °C | 15 °C |  | 25 °C | 15 °C |
| Untreated | 92.25 c | 87.75 c |  | 8.44 c | 9.25 d |
| SA (50 mg L-1) | 100 a | 97.25 a |  | 6.53 a | 7.32 a |
| SA (100 mg L-1) | 96.00 b | 93.75 b |  | 7.47 b | 8.32 b |
| SA (150 mg L-1) | 97.50 ab | 92.25 b |  | 8.28 c | 8.66 c |
| LSD 0.05 | 2.75 | 1.64 |  | 0.44 | 0.22 |
| CV (%) | 1.78 | 1.11 |  | 3.57 | 1.65 |

Means within each column followed by the same lowercase letters are not significantly different at P<0.05 by LSD.

TABLE S2: Effects of seed priming with salicylic acid (SA) on shoot height, root length and seedling growth rate of Tainan 9 peanut seeds at 25°C and 15°C.

| Treatments | Shoot height (cm) | |  | Root length (cm) | |  | Seedling growth rate (mg/seedling) | |
| --- | --- | --- | --- | --- | --- | --- | --- | --- |
| 25 °C | 15 °C |  | 25 °C | 15 °C |  | 25 °C | 15 °C |
| Untreated | 4.63 c | 3.30 d |  | 5.04 c | 3.64 c |  | 182 d | 58 |
| SA (50 mg L-1) | 6.70 a | 5.45 a |  | 7.78 a | 6.35 a |  | 346 a | 136 |
| SA (100 mg L-1) | 5.52 b | 4.02 c |  | 6.98 b | 5.50 b |  | 225 c | 76 |
| SA (150 mg L-1) | 5.67 b | 4.66 b |  | 6.88 b | 5.37 b |  | 265 b | 93 |
| LSD 0.05 | 0.16 | 0.40 |  | 0.32 | 0.17 |  | 25.58 | ns |
| CV (%) | 1.81 | 5.80 |  | 3.01 | 2.08 |  | 6.29 |  |

Means within each column followed by the same lowercase letters are not significantly different at P<0.05 by LSD.

TABLE S3:Effects of seed priming with ascorbate acid (ASA) on germination percentage and mean germination time of Tainan 9 peanut seeds at 25°C and 15°C.

| Treatments | Germination (%) | |  | Mean germination time (days) | |
| --- | --- | --- | --- | --- | --- |
| 25 °C | 15 °C |  | 25 °C | 15 °C |
| Untreated | 93.50 c | 89.75 c |  | 8.26 c | 9.32 c |
| ASA (25 mg L-1) | 94.25 bc | 93.00 b |  | 8.13 bc | 8.53 b |
| ASA (50 mg L-1) | 100 a | 98.50 a |  | 6.69 a | 7.48 a |
| ASA (100 mg L-1) | 96.25 b | 93.75 b |  | 7.85 b | 8.47 b |
| LSD 0.05 | 2.17 | 1.31 |  | 0.44 | 0.45 |
| CV (%) | 1.42 | 0.88 |  | 3.50 | 3.30 |

Means within each column followed by the same lowercase letters are not significantly different at P<0.05 by LSD.

TABLE S4: Effects of seed priming with ascorbate acid (ASA) on shoot height, root length and seedling growth rate of Tainan 9 peanut seeds at 25°C and 15°C.

| Treatments | Shoot height (cm) | |  | Root length (cm) | |  | Seedling growth rate (mg/seedling) | |
| --- | --- | --- | --- | --- | --- | --- | --- | --- |
| 25 °C | 15 °C |  | 25 °C | 15 °C |  | 25 °C | 15 °C |
| Untreated | 4.73 c | 3.52 c |  | 5.48 d | 4.02 c |  | 205 d | 72 c |
| ASA (25 mg L-1) | 5.85 b | 4.67 b |  | 6.72 c | 5.34 b |  | 294 b | 83 b |
| ASA (50 mg L-1) | 6.56 a | 5.56 a |  | 8.04 a | 6.55 a |  | 326 a | 125 a |
| ASA (100 mg L-1) | 5.72 b | 4.72 b |  | 7.22 b | 5.39 b |  | 261 c | 90 b |
| LSD 0.05 | 0.17 | 0.17 |  | 0.24 | 0.18 |  | 22.87 | 8.85 |
| CV (%) | 1.87 | 2.30 |  | 2.26 | 2.19 |  | 5.38 | 6.22 |

Means within each column followed by the same lowercase letters are not significantly different at P<0.05 by LSD.

TABLE S5:Effects of seed priming with CaCl2 on germination percentage and mean germination time of Tainan 9 peanut seeds at 25°C and 15°C.

| Treatments | Germination (%) | |  | Mean germination time (days) | |
| --- | --- | --- | --- | --- | --- |
| 25 °C | 15 °C |  | 25 °C | 15 °C |
| Untreated | 91.75 c | 88.25 c |  | 8.32 b | 9.12 c |
| CaCl2 (25 mM) | 95.00 b | 93.75 b |  | 8.20 b | 8.76 b |
| CaCl2 (50 mM) | 98.25 a | 98.00 a |  | 7.20 a | 8.02 a |
| CaCl2 (100 mM) | 95.75 b | 94.00 b |  | 8.05 b | 8.67 b |
| LSD 0.05 | 2.14 | 1.33 |  | 0.46 | 0.29 |
| CV (%) | 1.40 | 0.89 |  | 3.62 | 2.06 |

Means within each column followed by the same lowercase letters are not significantly different at P<0.05 by LSD.

TABLE S6: Effects of seed priming with CaCl2 on shoot height, root length and seedling growth rate of Tainan 9 peanut seeds at 25°C and 15°C.

| Treatments | Shoot height (cm) | |  | Root length (cm) | |  | Seedling growth rate (mg/seedling) | |
| --- | --- | --- | --- | --- | --- | --- | --- | --- |
| 25 °C | 15 °C |  | 25 °C | 15 °C |  | 25 °C | 15 °C |
| Untreated | 4.86 c | 3.76 c |  | 5.54 c | 4.38 d |  | 196 c | 80 c |
| CaCl2 (25 mM) | 5.64 b | 4.64 b |  | 6.87 b | 5.67 b |  | 248 b | 97 ab |
| CaCl2 (50 mM) | 6.08 a | 5.18 a |  | 7.56 a | 6.29 a |  | 317 a | 104 a |
| CaCl2 (100 mM) | 5.59 b | 4.59 b |  | 7.09 b | 5.30 c |  | 237 b | 92 b |
| LSD 0.05 | 0.25 | 0.22 |  | 0.28 | 0.13 |  | 15.84 | 8.46 |
| CV (%) | 2.88 | 3.07 |  | 2.60 | 1.59 |  | 4.03 | 6.05 |

Means within each column followed by the same lowercase letters are not significantly different at P<0.05 by LSD.

TABLE S7:Effects of seed priming with chitosan on germination percentage and mean germination time of Tainan 9 peanut seeds at 25°C and 15°C.

| Treatments | Germination (%) | |  | Mean germination time (days) | |
| --- | --- | --- | --- | --- | --- |
| 25 °C | 15 °C |  | 25 °C | 15 °C |
| Untreated | 92.75 b | 84.75 c |  | 8.36 b | 9.05 c |
| 0.25% chitosan | 93.25 b | 92.00 b |  | 8.53 b | 8.92 c |
| 0.50% chitosan | 98.25 a | 96.75 a |  | 7.16 a | 7.84 a |
| 0.75% chitosan | 97.25 a | 93.25 b |  | 7.40 a | 8.35 b |
| LSD 0.05 | 2.09 | 1.56 |  | 0.33 | 0.38 |
| CV (%) | 1.38 | 1.06 |  | 2.62 | 2.75 |

Means within each column followed by the same lowercase letters are not significantly different at P<0.05 by LSD.

TABLE S8: Effects of seed priming with chitosan on shoot height, root length and seedling growth rate of Tainan 9 peanut seeds at 25°C and 15°C.

| Treatments | Shoot height (cm) | |  | Root length (cm) | |  | Seedling growth rate (mg/seedling) | |
| --- | --- | --- | --- | --- | --- | --- | --- | --- |
| 25 °C | 15 °C |  | 25 °C | 15 °C |  | 25 °C | 15 °C |
| Untreated | 4.48 c | 4.02 d |  | 5.62 c | 4.44 c |  | 202 d | 62 c |
| 0.25% chitosan | 5.29 b | 4.52 c |  | 6.97 b | 5.27 b |  | 235 c | 85 b |
| 0.50% chitosan | 6.16 a | 5.28 a |  | 7.37 a | 6.23 a |  | 309 a | 112 a |
| 0.75% chitosan | 5.20 b | 4.98 b |  | 6.79 b | 5.14 b |  | 266 b | 94 b |
| LSD 0.05 | 0.43 | 0.11 |  | 0.27 | 0.14 |  | 25.87 | 13.78 |
| CV (%) | 5.00 | 1.51 |  | 2.60 | 1.74 |  | 6.53 | 9.89 |

Means within each column followed by the same lowercase letters are not significantly different at P<0.05 by LSD.
